# Supplementary material for: An Ensemble Learning Approach to Improving Prediction of Case Duration for Spine Surgery: Algorithm Development and Validation
Source: PubMed Central journal article supplement (PMC9912154; doi:10.2196/39650), 2023-01-26

# A Random Forest

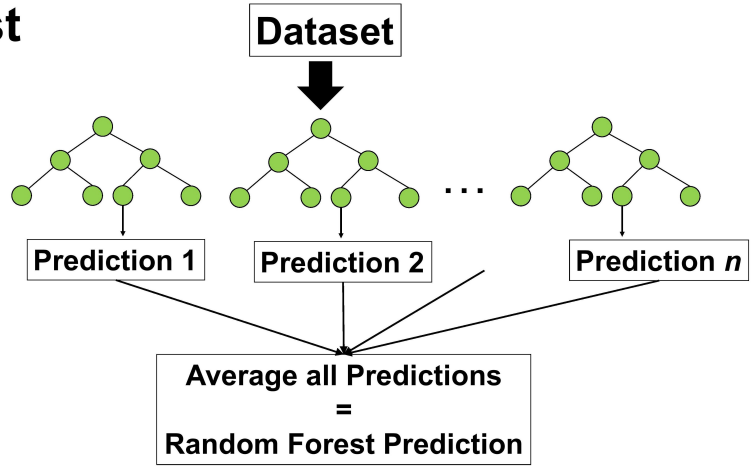

# B Bagging

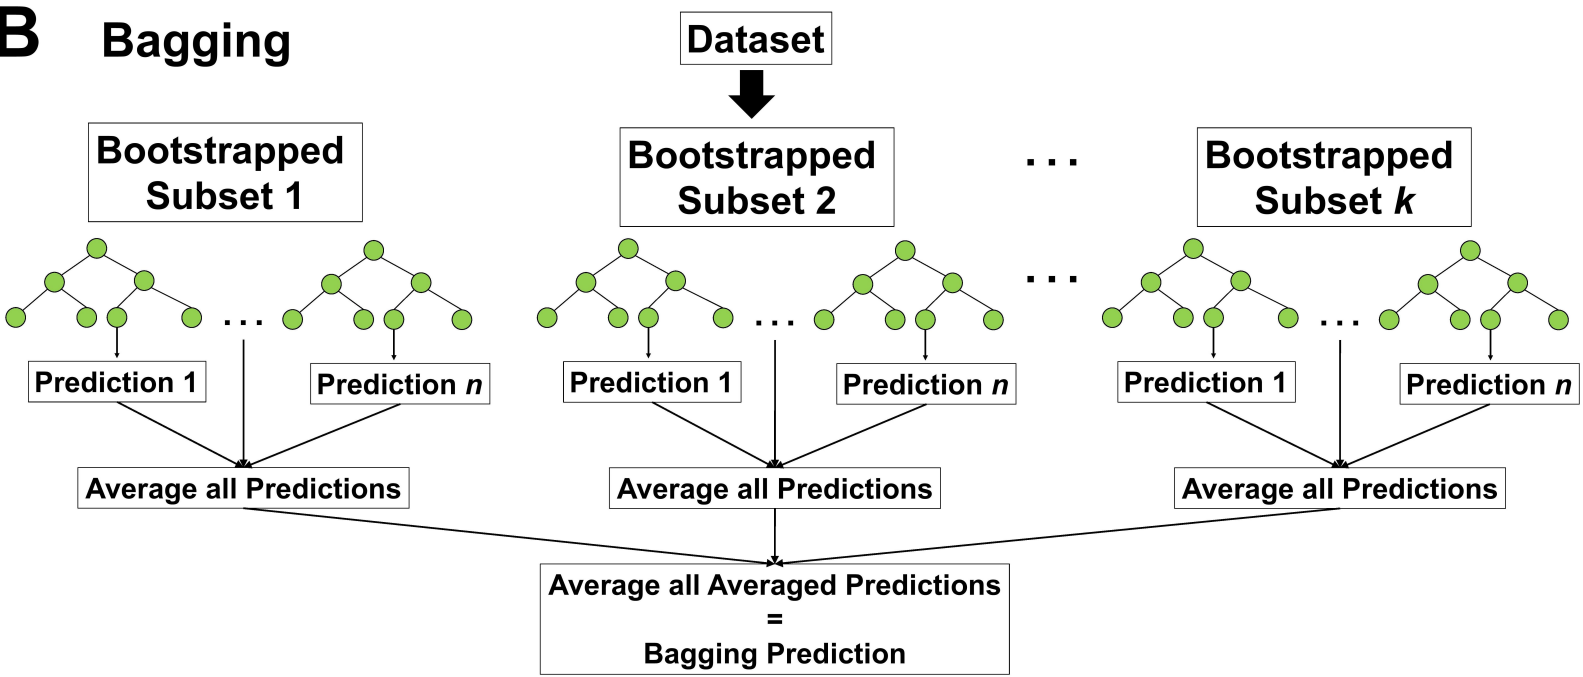

# C XGBoost

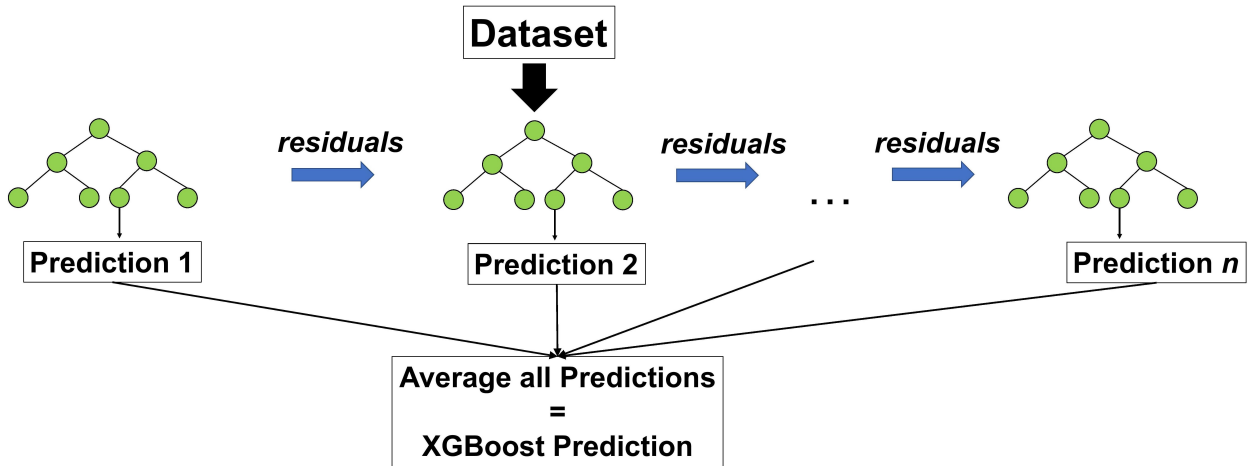

Supplement: periop_v6i1e39650_app1.pdf [file periop_v6i1e39650_app1.pdf]
